# Supplementary material
Source: PubMed Central journal article supplement (PMC5824320)
Supplement: jamaoncol-3-1335-s001.pdf [file jamaoncol-3-1335-s001.pdf]

## Supplementary Online Content

Dasari A, Shen C, Halperin D, et al. Trends in the incidence, prevalence, and survival outcomes in patients with neuroendocrine tumors in the United States. *JAMA Oncol*. Published online April 27, 2017. doi:10.1001/jamaoncol.2017.0589

**eTable 1.** Incidence of Neuroendocrine Tumors (NETs) Over Time

**eTable 2.** 10-Year and 20-Year Prevalence of NET

**eTable 3.** Median Survival of Distant Stage G1/G2 NETs Diagnosed From 2000-2012

This supplementary material has been provided by the authors to give readers additional information about their work.

**eTable 1. Incidence of Neuroendocrine Tumors (NETs) Over Time**

| Registry | Year    | Rate | Number of NET cases | Number at risk | Age specific incidence |             |             |
|----------|---------|------|---------------------|----------------|------------------------|-------------|-------------|
|          |         |      |                     |                | less than 50           | 50-64 years | 65 or older |
| SEER 9   | 1973    | 1.09 | 152                 | 16,383,240     | 0.60                   | 1.83        | 3.05        |
|          | 1974    | 1.41 | 228                 | 18,804,226     | 0.61                   | 2.50        | 4.73        |
|          | 1975    | 1.58 | 280                 | 20,491,638     | 0.72                   | 2.88        | 5.00        |
|          | 1976    | 1.37 | 250                 | 20,645,967     | 0.60                   | 2.81        | 4.12        |
|          | 1977    | 1.61 | 288                 | 20,824,399     | 0.68                   | 3.09        | 5.18        |
|          | 1978    | 1.43 | 272                 | 21,035,770     | 0.58                   | 2.93        | 4.54        |
|          | 1979    | 1.66 | 312                 | 21,272,552     | 0.57                   | 3.75        | 5.40        |
|          | 1980    | 1.44 | 279                 | 21,526,796     | 0.48                   | 3.30        | 4.72        |
|          | 1981    | 1.31 | 249                 | 21,689,241     | 0.42                   | 2.79        | 4.61        |
|          | 1982    | 1.57 | 306                 | 21,822,466     | 0.44                   | 3.28        | 6.02        |
|          | 1983    | 1.63 | 321                 | 21,998,396     | 0.49                   | 3.72        | 5.69        |
|          | 1984    | 1.72 | 345                 | 22,197,735     | 0.45                   | 3.65        | 6.72        |
|          | 1985    | 1.69 | 346                 | 22,423,982     | 0.53                   | 3.49        | 6.20        |
|          | 1986    | 2.64 | 533                 | 22,644,373     | 0.90                   | 5.28        | 9.52        |
|          | 1987    | 2.76 | 569                 | 22,872,669     | 0.87                   | 6.01        | 9.74        |
|          | 1988    | 2.82 | 593                 | 23,111,066     | 0.82                   | 6.10        | 10.33       |
|          | 1989    | 3.00 | 635                 | 23,349,445     | 0.90                   | 5.97        | 11.49       |
|          | 1990    | 2.91 | 629                 | 23,657,474     | 0.95                   | 5.60        | 10.97       |
|          | 1991    | 3.18 | 707                 | 23,998,620     | 0.92                   | 6.58        | 12.07       |
| SEER 13  | 1992    | 3.21 | 1,016               | 35,796,360     | 0.88                   | 6.68        | 12.38       |
|          | 1993    | 3.32 | 1,070               | 36,209,880     | 0.92                   | 7.02        | 12.65       |
|          | 1994    | 3.42 | 1,116               | 36,515,300     | 0.97                   | 6.98        | 13.23       |
|          | 1995    | 3.96 | 1,299               | 36,853,744     | 0.89                   | 8.78        | 15.81       |
|          | 1996    | 4.12 | 1,372               | 37,247,652     | 1.05                   | 8.93        | 16.02       |
|          | 1997    | 4.29 | 1,456               | 37,697,798     | 1.11                   | 8.73        | 17.24       |
|          | 1998    | 4.73 | 1,631               | 38,144,594     | 1.12                   | 9.30        | 19.98       |
|          | 1999    | 4.76 | 1,671               | 38,555,266     | 1.06                   | 10.93       | 18.62       |
|          | SEER 18 | 2000 | 4.90                | 3,613          | 78,996,813             | 1.24        | 10.60       |
| 2001     |         | 4.67 | 3,510               | 79,867,817     | 1.23                   | 9.88        | 18.15       |
| 2002     |         | 5.14 | 3,947               | 80,629,975     | 1.29                   | 11.56       | 19.57       |
| 2003     |         | 5.29 | 4,123               | 81,347,854     | 1.36                   | 11.02       | 20.98       |
| 2004     |         | 5.44 | 4,335               | 82,055,585     | 1.39                   | 12.08       | 20.79       |
| 2005     |         | 5.56 | 4,378               | 80,414,394     | 1.38                   | 12.10       | 21.71       |
| 2006     |         | 5.94 | 4,880               | 83,099,557     | 1.46                   | 12.69       | 23.62       |
| 2007     |         | 6.16 | 5,196               | 83,810,676     | 1.51                   | 13.83       | 23.74       |
| 2008     |         | 6.27 | 5,401               | 84,618,783     | 1.54                   | 14.34       | 23.79       |
| 2009     |         | 6.38 | 5,628               | 85,402,713     | 1.61                   | 14.42       | 24.18       |
| 2010     |         | 6.57 | 5,913               | 86,156,841     | 1.68                   | 14.53       | 25.11       |
| 2011     |         | 6.61 | 6,042               | 86,817,163     | 1.75                   | 14.27       | 25.30       |

**eTable 2. 10-Year and 20-Year Prevalence of NET**

| Year | 20-year duration<br>Prevalence | 20-year<br>Count | 10-year duration<br>Prevalence | 10-year<br>Count |
|------|--------------------------------|------------------|--------------------------------|------------------|
| 1993 | 0.0060%                        | 2,545            |                                |                  |
| 1994 | 0.0111%                        | 4,668            |                                |                  |
| 1995 | 0.0157%                        | 6,618            |                                |                  |
| 1996 | 0.0196%                        | 8,270            |                                |                  |
| 1997 | 0.0233%                        | 9,803            |                                |                  |
| 1998 | 0.0265%                        | 11,167           |                                |                  |
| 1999 | 0.0294%                        | 12,406           |                                |                  |
| 2000 | 0.0321%                        | 13,517           |                                |                  |
| 2001 | 0.0345%                        | 14,523           |                                |                  |
| 2002 | 0.0367%                        | 15,443           |                                |                  |
| 2003 | 0.0384%                        | 16,172           | 0.0061%                        | 2,556            |
| 2004 | 0.0400%                        | 16,864           | 0.0111%                        | 4,694            |
| 2005 | 0.0415%                        | 17,486           | 0.0158%                        | 6,660            |
| 2006 | 0.0428%                        | 18,016           | 0.0198%                        | 8,323            |
| 2007 | 0.0439%                        | 18,484           | 0.0234%                        | 9,868            |
| 2008 | 0.0449%                        | 18,920           | 0.0267%                        | 11,241           |
| 2009 | 0.0458%                        | 19,303           | 0.0296%                        | 12,489           |
| 2010 | 0.0466%                        | 19,626           | 0.0323%                        | 13,607           |
| 2011 | 0.0473%                        | 19,942           | 0.0347%                        | 14,620           |
| 2012 | 0.0480%                        | 20,233           | 0.0369%                        | 15,542           |

\*all calculation are based on SEER 13. Prevalence date is Jan 1<sup>st</sup> of each year.

**eTable 3. Median Survival of Distant Stage G1/G2 NETs Diagnosed From 2000-2012**

| Primary Tumor Site | Median Survival (months) | Survival Rate (%) |        |
|--------------------|--------------------------|-------------------|--------|
|                    |                          | 3-year            | 5-year |
| Appendix           | NA                       | NA                | NA     |
| Cecum              | 98                       | 70                | 61     |
| Colon              | 14                       | 33                | 29     |
| Lung               | 24                       | 39                | 32     |
| Pancreas           | 60                       | 62                | 50     |
| Rectum             | 33                       | 48                | 28     |
| Small Intestine    | 103                      | 80                | 69     |
| Stomach            | 29                       | 45                | 32     |

\*NA = not assessed due to small numbers
